# Supplementary material for: Exposing the Limitations of Molecular Machine Learning with Activity Cliffs
Source: PubMed Central journal article supplement (PMC9749029; doi:10.1021/acs.jcim.2c01073), 2022-12-01
Supplement: ci2c01073_si_001.pdf [file ci2c01073_si_001.pdf]

# Exposing the limitations of molecular machine learning with activity cliffs

Derek van Tilborg,<sup>1,2</sup> Alisa Alenicheva,<sup>3</sup> and Francesca Grisoni<sup>1,2\*</sup>

<sup>1</sup>Eindhoven University of Technology, Institute for Complex Molecular Systems and Dept. Biomedical Engineering, Eindhoven, Netherlands.

<sup>2</sup>Centre for Living Technologies, Alliance TU/e, WUR, UU, UMC Utrecht, Utrecht, The Netherlands.

<sup>3</sup>JetBrains Research. Saint Petersburg, Russia.

\*Corresponding author: [f.grisoni@tue.nl](mailto:f.grisoni@tue.nl)

**Table S1 | Presence of highly similar compounds in commercially available libraries.** For each library, the number of molecules having *at least* one highly similar neighbor (determined as having a Tanimoto similarity on ECFPs larger than 90%) was reported, along with the corresponding percentage. ECFPs (1024 bits, radius = 2) were computed with RDKit on canonical SMILES strings, after filtering out duplicates and salts, within KNIME 4.3.3.

| Provider and library                      | no. molecules | no. similar | perc. similar |
|-------------------------------------------|---------------|-------------|---------------|
| <i>Asinex</i> <sup>a</sup>                | 572,393       | 76,794      | 13.42%        |
| <i>Specs</i> (10, 20, 50 mg) <sup>b</sup> | 199,965       | 13,369      | 6.69%         |
| <i>Enamine Advanced</i> <sup>c</sup>      | 604,507       | 173,383     | 28.77%        |
| <i>Enamine Premium</i> <sup>c</sup>       | 40,694        | 18,936      | 46.53%        |

<sup>a</sup>"All screening compounds", downloaded from [https://www.asinex.com/screening-libraries-\(all-libraries\)](https://www.asinex.com/screening-libraries-(all-libraries)) on February 2022.

<sup>b</sup>Downloaded from <https://enamine.net/compound-collections/screening-collection/> on February 2022.

<sup>c</sup>Provided by Specs (<https://www.specs.net/>) on March 2021.

## Supporting Information

**Table S2 | Dataset overview**, with receptor class, ChEMBL ID, response type (inhibition [ $K_i$ ] or agonism [ $EC_{50}$ ]), number of compounds in the train and test set, along with the number of activity cliff compounds in the train and test set.

| Target name (ID)                                                  | Receptor Class | ChEMBL ID  | Type      | n train/test | n cliff train/test |
|-------------------------------------------------------------------|----------------|------------|-----------|--------------|--------------------|
| Androgen Receptor (AR)                                            | NR             | CHEMBL1871 | $K_i$     | 525/134      | 126/31             |
| Cannabinoid receptor 1 (CB1)                                      | GPCR           | CHEMBL218  | $EC_{50}$ | 823/208      | 292/75             |
| Coagulation factor X (FX)                                         | Protease       | CHEMBL244  | $K_i$     | 2476/621     | 1080/270           |
| Delta opioid receptor (DOR)                                       | GPCR           | CHEMBL236  | $K_i$     | 2077/521     | 772/193            |
| Dopamine D3 receptor (D3R)                                        | GPCR           | CHEMBL234  | $K_i$     | 2923/734     | 1150/291           |
| Dopamine D4 receptor (D4R)                                        | GPCR           | CHEMBL219  | $K_i$     | 1485/374     | 572/143            |
| Dopamine transporter (DAT)                                        | Other          | CHEMBL238  | $K_i$     | 839/213      | 209/54             |
| Dual specificity protein kinase CLK4                              | Kinase         | CHEMBL4203 | $K_i$     | 582/149      | 51/13              |
| Farnesoid X receptor (FXR)                                        | NR             | CHEMBL2047 | $EC_{50}$ | 503/128      | 195/50             |
| Ghrelin receptor (GHSR)                                           | GPCR           | CHEMBL4616 | $EC_{50}$ | 543/139      | 262/68             |
| Glucocorticoid receptor (GR)                                      | NR             | CHEMBL2034 | $K_i$     | 598/152      | 183/47             |
| Glycogen synthase kinase-3 beta (GSK3)                            | Kinase         | CHEMBL262  | $K_i$     | 683/173      | 127/31             |
| Histamine H1 receptor (HRH1)                                      | GPCR           | CHEMBL231  | $K_i$     | 776/197      | 178/46             |
| Histamine H3 receptor (HRH3)                                      | GPCR           | CHEMBL264  | $K_i$     | 2288/574     | 865/219            |
| Janus kinase 1 (JAK1)                                             | Kinase         | CHEMBL2835 | $K_i$     | 489/126      | 36/10              |
| Janus kinase 2 (JAK2)                                             | Kinase         | CHEMBL2971 | $K_i$     | 779/197      | 95/25              |
| Kappa opioid receptor (KOR) agonism                               | GPCR           | CHEMBL237  | $EC_{50}$ | 762/193      | 319/81             |
| Kappa opioid receptor (KOR) inhibition                            | GPCR           | CHEMBL237  | $K_i$     | 2081/521     | 753/188            |
| $\mu$ -opioid receptor (MOR)                                      | GPCR           | CHEMBL233  | $K_i$     | 2512/630     | 889/222            |
| Orexin receptor 2 (OX2R)                                          | GPCR           | CHEMBL4792 | $K_i$     | 1174/297     | 610/153            |
| Peroxisome proliferator-activated receptor alpha (PPAR $\alpha$ ) | NR             | CHEMBL239  | $EC_{50}$ | 1377/344     | 568/141            |
| Peroxisome proliferator-activated receptor delta (PPAR $\delta$ ) | NR             | CHEMBL3979 | $EC_{50}$ | 900/225      | 373/94             |
| Peroxisome proliferator-activated receptor gamma (PPAR $\gamma$ ) | NR             | CHEMBL235  | $EC_{50}$ | 1879/470     | 703/178            |
| PI3-kinase p110-alpha subunit (PIK3CA)                            | Transferase    | CHEMBL4005 | $K_i$     | 767/193      | 281/70             |
| Serine/threonine-protein kinase PIM1                              | Kinase         | CHEMBL2147 | $K_i$     | 1162/294     | 387/98             |
| Serotonin 1a receptor (5-HT1A)                                    | GPCR           | CHEMBL214  | $K_i$     | 2651/666     | 917/230            |
| Serotonin transporter (SERT)                                      | Other          | CHEMBL228  | $K_i$     | 1362/342     | 479/120            |
| Sigma opioid receptor (SOR)                                       | Other          | CHEMBL287  | $K_i$     | 1061/267     | 371/93             |
| Thrombin                                                          | Protease       | CHEMBL204  | $K_i$     | 2201/553     | 790/199            |
| Tyrosine-protein kinase ABL1                                      | Kinase         | CHEMBL1862 | $K_i$     | 633/161      | 202/51             |

## Supporting Information

**Table S3 | Activity cliff definitions across different published studies.**

| Descriptor                              | Similarity                                     | Potency difference | Study                                                                                                                                                                                                                       |
|-----------------------------------------|------------------------------------------------|--------------------|-----------------------------------------------------------------------------------------------------------------------------------------------------------------------------------------------------------------------------|
| MACCs                                   | Tanimoto coeff. of 0.85                        | 2-fold             | Bajorath group. <i>Future Med. Chem.</i> <b>7</b> , 1565-1579 (2015); <i>F1000Res.</i> <b>2</b> (2013).                                                                                                                     |
| ECFPs                                   | Tanimoto coeff. of 0.55                        | 2-fold             | Bajorath group. <i>Future Med. Chem.</i> <b>7</b> , 1565-1579 (2015); <i>F1000Res.</i> <b>2</b> (2013).                                                                                                                     |
| MMP                                     | Substructure match                             | 2-fold             | Bajorath group. <i>Molecular informatics.</i> <b>35</b> , 181-191 (2016); <i>Future Med. Chem.</i> <b>7</b> , 1565-1579 (2015); <i>F1000Res.</i> <b>2</b> (2013); <i>J. Chem. Inf. Model.</i> <b>52</b> , 1138-1145 (2012). |
| MMP                                     | Substructure match                             | 1 or 2-fold        | Pérez-Benito <i>et al.</i> <i>J. Chem. Theory Comput.</i> <b>15</b> , 1884-1895 (2019).                                                                                                                                     |
| Several 2D and 3D, including MACCS      | Several similarity measures between 0.8 - 0.95 | 1 or 2-fold        | Bajorath group. <i>J. Chem. Inf. Model.</i> <b>52</b> , 670-677 (2012).                                                                                                                                                     |
| Maximum common substructure             | 50% of common substructure atoms               | 1-fold             | Jiménez-Luna. <i>J. Chem. Inf. Model.</i> <b>62</b> , 274-283 (2022).                                                                                                                                                       |
| Physicochemical properties              | 50% of max SALI score                          | -                  | Seebeck <i>et al.</i> <i>ChemMedChem</i> , <b>6</b> , 1630-1639 (2011).                                                                                                                                                     |
| MACCs, ECFP, TARIS, ROCS, Pharmacophore | SALI score                                     | Variable           | Medina-Franco <i>et al.</i> <i>J. Chem. Inf. Model.</i> <b>49</b> , 477-491 (2009).                                                                                                                                         |
| AP descriptor                           | Dice similarity of 0.7                         | Custom metric      | Sheridan <i>et al.</i> <i>J. Chem. Inf. Model.</i> <b>60</b> , 1969-1982 (2020).                                                                                                                                            |

## Supporting Information

**Table S4 | Training/test set analysis**, with number of compounds in the train and test set, the number of activity cliff compounds, the mean number of activity cliff 'partners' per activity cliff compound, the number of activity cliff compounds with all activity cliff 'partners' in the test set, and the mean maximal substructure/scaffold/SMILES similarity of all test activity cliff compounds to the train set.

| Target ID     | n train/test | n cliff train/test | Mean cliff partners | All cliff partners in test | Mean max. similarity test cliff to train |
|---------------|--------------|--------------------|---------------------|----------------------------|------------------------------------------|
| AR            | 525/134      | 126/31             | 1.66                | 3                          | 0.78 / 0.89 / 0.96                       |
| CB1           | 823/208      | 292/75             | 2.25                | 3                          | 0.81 / 0.92 / 0.96                       |
| FX            | 2476/621     | 1080/270           | 3.25                | 29                         | 0.83 / 0.94 / 0.96                       |
| DOR           | 2077/521     | 772/193            | 2.91                | 23                         | 0.83 / 0.92 / 0.96                       |
| D3R           | 2923/734     | 1150/291           | 2.73                | 24                         | 0.81 / 0.95 / 0.95                       |
| D4R           | 1485/374     | 572/143            | 2.68                | 12                         | 0.79 / 0.95 / 0.95                       |
| DAT           | 839/213      | 209/54             | 1.73                | 11                         | 0.75 / 0.90 / 0.92                       |
| CLK4          | 582/149      | 51/13              | 1.25                | 0                          | 0.67 / 0.93 / 0.92                       |
| FXR           | 503/128      | 195/50             | 2.96                | 2                          | 0.81 / 0.94 / 0.97                       |
| GHSR          | 543/139      | 262/68             | 5.51                | 0                          | 0.82 / 0.94 / 0.96                       |
| GR            | 598/152      | 183/47             | 2.64                | 9                          | 0.80 / 0.92 / 0.95                       |
| GSK3          | 683/173      | 127/31             | 1.59                | 3                          | 0.78 / 0.92 / 0.93                       |
| HRH1          | 776/197      | 178/46             | 1.75                | 9                          | 0.77 / 0.90 / 0.93                       |
| HRH3          | 2288/574     | 865/219            | 2.82                | 17                         | 0.81 / 0.96 / 0.95                       |
| JAK1          | 489/126      | 36/10              | 1.43                | 0                          | 0.82 / 0.91 / 0.96                       |
| JAK2          | 779/197      | 95/25              | 2.3                 | 1                          | 0.77 / 0.95 / 0.94                       |
| KOR (a)       | 762/193      | 319/81             | 4.43                | 4                          | 0.84 / 0.92 / 0.96                       |
| KOR (i)       | 2081/521     | 753/188            | 2.99                | 15                         | 0.83 / 0.92 / 0.96                       |
| MOR           | 2512/630     | 889/222            | 3.71                | 11                         | 0.79 / 0.95 / 0.96                       |
| OX2R          | 1174/297     | 610/153            | 2.37                | 15                         | 0.84 / 0.92 / 0.96                       |
| PPAR $\alpha$ | 1377/344     | 568/141            | 2.84                | 6                          | 0.83 / 0.93 / 0.96                       |
| PPAR $\delta$ | 900/225      | 373/94             | 2.5                 | 18                         | 0.83 / 0.93 / 0.96                       |
| PPAR $\gamma$ | 1879/470     | 703/178            | 2.18                | 11                         | 0.80 / 0.95 / 0.95                       |
| PIK3CA        | 767/193      | 281/70             | 3.74                | 6                          | 0.79 / 0.94 / 0.95                       |
| PIM1          | 1162/294     | 387/98             | 2.31                | 21                         | 0.82 / 0.94 / 0.95                       |
| 5-HT1A        | 2651/666     | 917/230            | 2.16                | 15                         | 0.80 / 0.94 / 0.94                       |
| SERT          | 1362/342     | 479/120            | 2.27                | 14                         | 0.80 / 0.94 / 0.94                       |
| SOR           | 1061/267     | 371/93             | 2.32                | 17                         | 0.83 / 0.94 / 0.96                       |
| Thrombin      | 2201/553     | 790/199            | 3.23                | 6                          | 0.80 / 0.96 / 0.96                       |
| ABL1          | 633/161      | 202/51             | 3.16                | 18                         | 0.82 / 0.92 / 0.96                       |

## Supporting Information

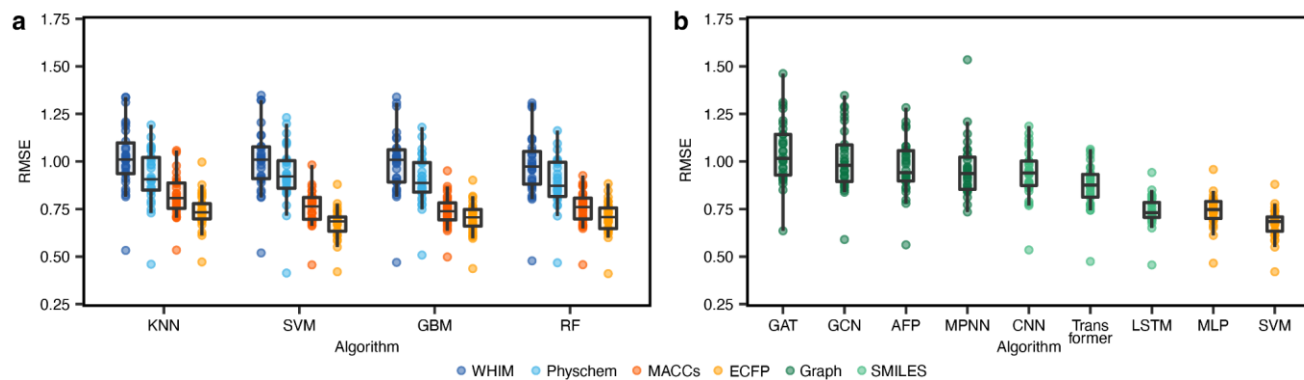

**Fig. S1 | Overall performance of machine learning methods on all targets.** **a**, RMSE using different traditional machine learning algorithms and molecular descriptors. **b**, RMSE using deep learning methods and unstructured molecular representations.

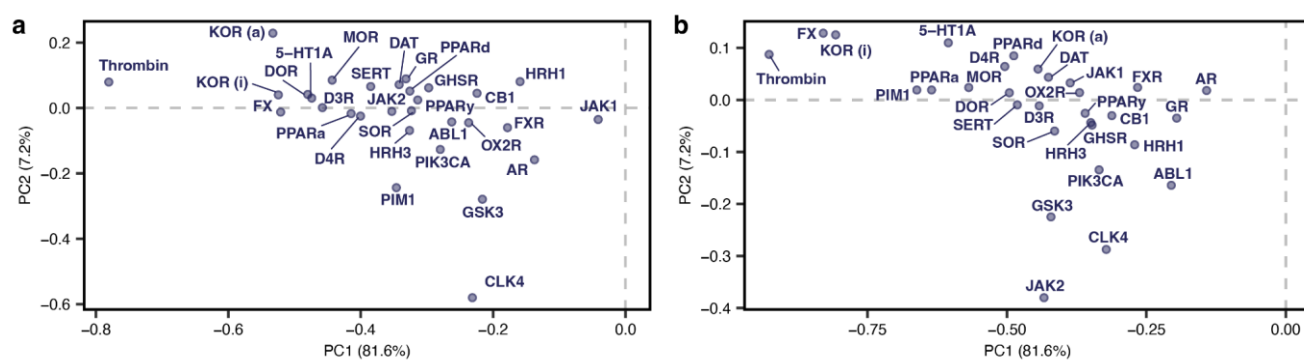

**Fig. S2 | PCA loadings of all methods.** **a**, Effects of individual data sets (loadings for PC1 and PC2) on the PCA of traditional machine learning methods (see Fig. 3b). **b**, Effects of individual data sets (loadings for PC1 and PC2) on the PCA of deep learning methods (see Fig. 4b).

## Supporting Information

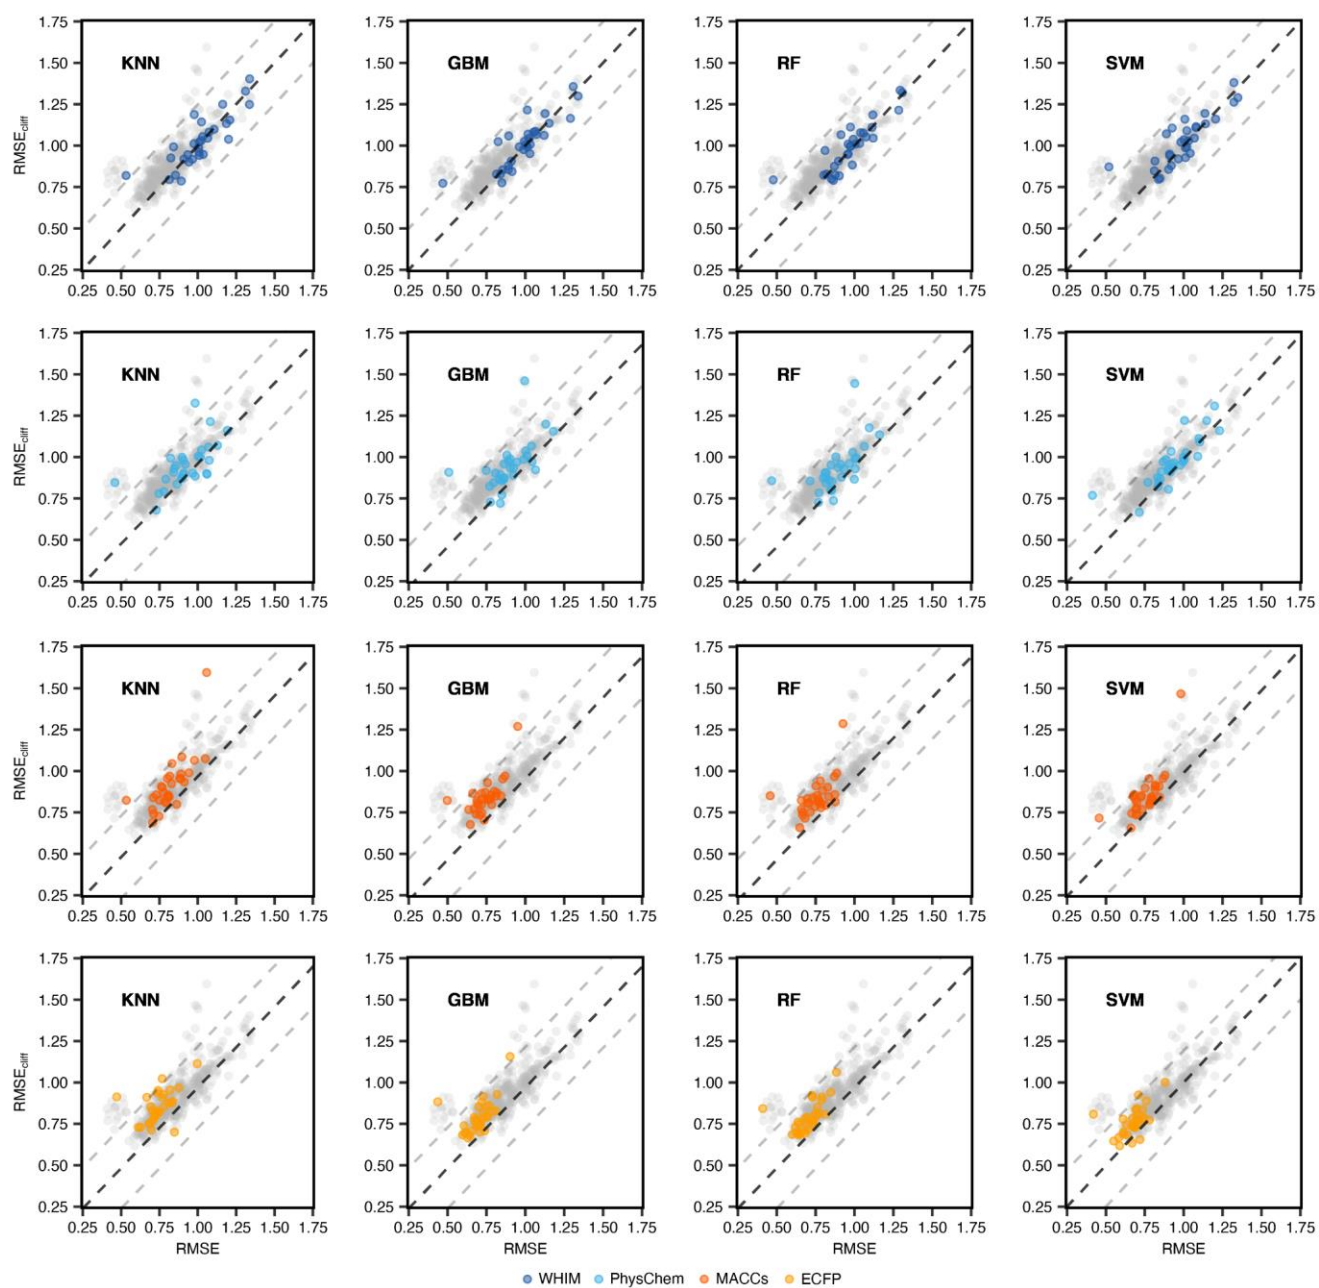

**Fig. S3 | Relative prediction error of activity cliff compounds.** Prediction error on activity cliff compounds compared to all compounds for all traditional machine learning algorithms and molecular descriptor combinations.

# Supporting Information

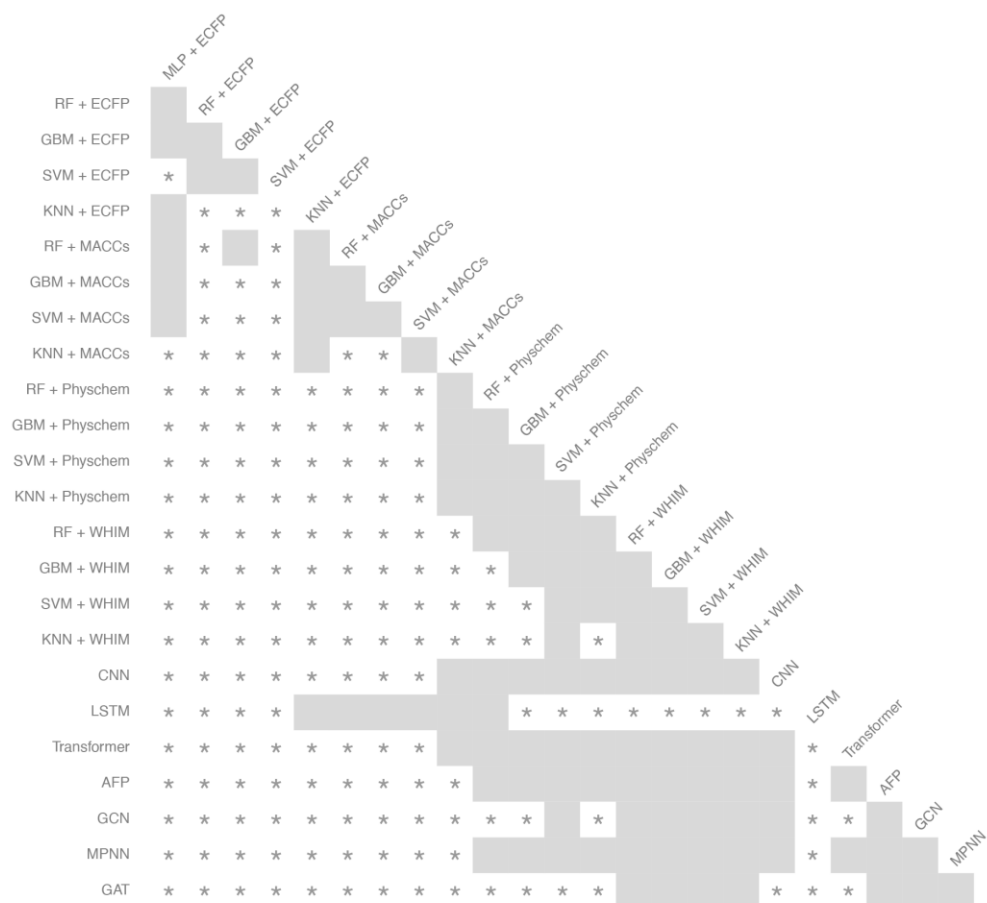

**Fig. S4 | Statistical differences between the  $RMSE_{cliff}$  values obtained by different machine learning strategies.** Asterisks indicate statistically significant differences ( $p < 0.05$ ) between pairs of methods, as obtained by the Wilcoxon rank-sum test (adjusted for false discovery rate using a Benjamini-Hochberg procedure).

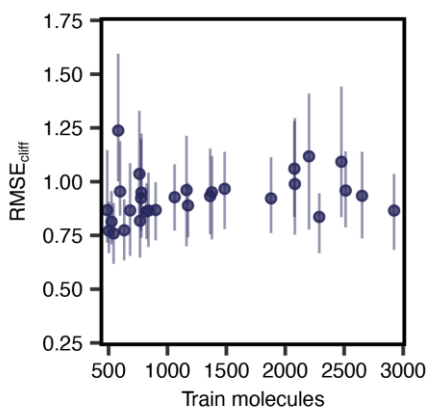

**Fig. S5 | Relationship between the number of training molecules on  $RMSE_{cliff}$ .** Error bars indicate the lowest and highest  $RMSE_{cliff}$ .

## Supporting Information

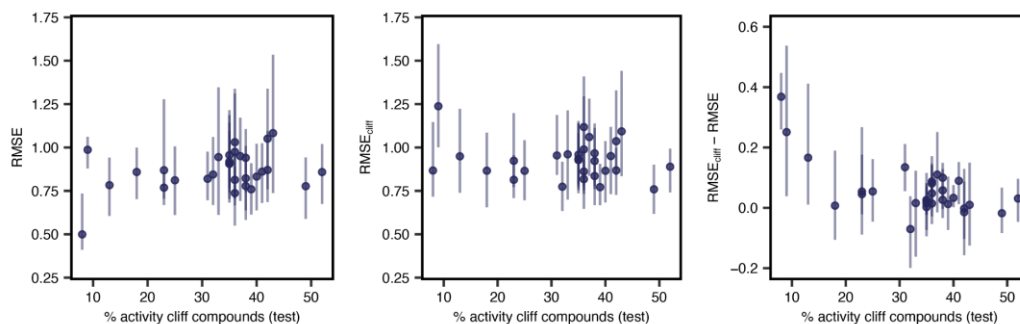

**Fig. S6 | Relationship between the fraction of activity cliff compounds and model performance.** **a.** Overall model performance (RMSE). Pearson correlation ( $r$ ) = 0.21. **b.** Performance on activity cliff compounds (RMSE<sub>cliff</sub>,  $r$  = -0.12). **c.** Difference between RMSE<sub>cliff</sub> and RMSE ( $r$  = -0.54). Error bars indicate the lowest and highest RMSEs.

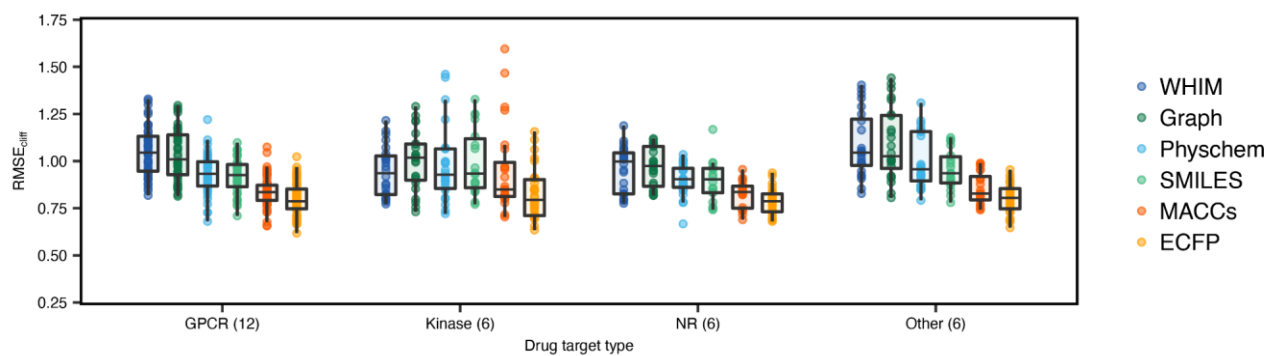

**Fig. S7 | Relationship between drug target classes and RMSE<sub>cliff</sub>.** All machine learning strategies are grouped by molecular descriptor/representation.
